# Supplementary material for: A Method for RNA Structure Prediction Shows Evidence for Structure in lncRNAs
Source: Front Mol Biosci. 2018 Dec 3;5:111. doi: 10.3389/fmolb.2018.00111 (PMC6286970; doi:10.3389/fmolb.2018.00111)
Supplement: Supplementary file 4 [file Table_4.XLSX]

## Sheet: Table A
	200	500	1000	5000
200	0,10±0,013	0,099±0,006	0,098±0,006	0,093±0,005
	(no OBE)
500	/	0,098±0,011	0,10±0,01	0,10±0,005
		(no OBE)
1000	/	/	0,10±0,011	0,10±0,004
			(no OBE)
5000	/	/	/	0,10±0,012
				(no OBE)

## Sheet: Table B
	200	500	1000	5000
200	p-value 1% = 0.090	p-value 1% = 0.083	p-value 1% = 0.082	p-value 1% = 0.078
	(no OBE)
500	/	p-value 1% = 0.092	p-value 1% = 0.091	p-value 1% = 0.089
		(no OBE)
1000	/	/	p-value 1% = 0.092	p-value 1% = 0.090
			(no OBE)
5000	/	/	/	p-value 1% = 0.096
				(no OBE)
